# Supplementary material for: CYP1A2 mRNA Expression Rather than Genetic Variants Indicate Hepatic CYP1A2 Activity
Source: MDPI journal article supplement (doi:10.3390/pharmaceutics14030532), 2022-02-27
Supplement: s1 [file s1]

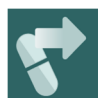

# Supplementary Materials: CYP1A2 mRNA Expression rather than Genetic Variants Indicate Hepatic CYP1A2 Activity

Ferenc Fekete, Katalin Mangó, Annamária Minus, Katalin Tóth and Katalin Monostory

**Table S1.** Sequences of primers and fluorophore-labelled probe oligonucleotides for real-time PCR assaying *CYP1A2* SNPs.

| SNP                                | Sequence (5'-3')                                                 |
|------------------------------------|------------------------------------------------------------------|
| <b>-163C&gt;A<br/>(rs762551)</b>   | Forward primer<br>AGAGAGCCAGCGTTCATG                             |
|                                    | Reverse primer<br>TGATGCGTGTTCTGTGCT                             |
|                                    | Wild-type probe<br>FAM-CATGCGTCCTG <u>G</u> CCCCACAG-BHQ1        |
|                                    | Mutant probe<br>FAM-CATGCGTCCTG <u>T</u> CCCCACAGG-BHQ2          |
| <b>-3860G&gt;A<br/>(rs2069514)</b> | Forward primer<br>ATCAAGCTACACATGATCG                            |
|                                    | Reverse primer<br>GGTGACACCTGTAATTC                              |
|                                    | Wild-type probe<br>FAM-CCTCTC <u>G</u> GATTCAAGCAATTGTCATGC-BHQ1 |
|                                    | Mutant probe<br>HEX-CCTCTC <u>A</u> GATTCAAGCAATTGTCATGC-BHQ2    |
| <b>2159G&gt;A<br/>(rs2472304)</b>  | Forward primer<br>GATCCAGAAGGAGCTGGG                             |
|                                    | Reverse primer<br>CACACAGCAGGCACATAAC                            |
|                                    | Wild-type probe<br>FAM-CAGGAGAAGCCTTG <u>A</u> ACCCAGG-BHQ1      |
|                                    | Mutant probe<br>HEX-CAGGAGAAGCCTTG <u>A</u> ACCCAGG-BHQ2         |

FAM, HEX fluorophores, BHQ1, BHQ2 quenchers.

**Table S2.** The flowchart of data analysis obtained from liver tissues.

| <b>Association of CYP1A2 function (activity or mRNA expression) with genetic and non-genetic variables</b> (multiple linear regression analysis) |                               |                           |
|--------------------------------------------------------------------------------------------------------------------------------------------------|-------------------------------|---------------------------|
|                                                                                                                                                  | Models 1 and 2                | Models 3 and 4            |
| Independent variables                                                                                                                            | Dependent variables           | Dependent variables       |
| CYP1A2 SNPs and non-genetic factors (sex, age, function reducing factors <sup>a</sup> , function increasing factors <sup>b</sup> )               | →CYP1A2 activity in the liver | →CYP1A2 mRNA in the liver |
| CYP1A2 haplotypes and non-genetic factors (sex, age, function reducing factors <sup>a</sup> , function increasing factors <sup>b</sup> )         | →CYP1A2 activity in the liver | →CYP1A2 mRNA in the liver |
| <b>Association between CYP1A2 activity and mRNA expression</b> (linear regression analysis)                                                      |                               |                           |
| CYP1A2 mRNA in the liver →CYP1A2 activity in the liver                                                                                           |                               |                           |
| CYP1A2 mRNA in leukocytes                                                                                                                        | →CYP1A2 activity in the liver |                           |

<sup>a</sup>CYP1A2 inhibitor (ciprofloxacin), amoxicillin+clavulanic acid therapy, chronic alcohol consumption; <sup>b</sup> CYP1A2 inducer.
